# Supplementary material
Source: publisher figshare collection journal article supplement (https://springernature.figshare.com/ndownloader/files/22839422)
Supplement: Supplementary file [file 22839422]

# RRT Call Handover Tool

RRT Call ID: \_\_\_\_\_ Date: \_\_\_\_\_ Time: \_\_\_\_\_ AM/PM

| RRT Role      | Present  | Full Name |
|---------------|----------|-----------|
| ICU Registrar | YES / NO |           |
| Med Registrar | YES / NO |           |
| RRT Nurse     | YES / NO |           |
| Ward Doctor   | YES / NO |           |
| Ward Nurse    | YES / NO |           |
| Other         | YES / NO |           |

Clinical Handover (tick when completed):

| Identity | Situation | Background | Assessment | Recommend |
|----------|-----------|------------|------------|-----------|
|          |           |            |            |           |

Ward Team Read-back (tick when completed):

| Read-back of plan | Contingency plan | Resus Status | Happy with plan |
|-------------------|------------------|--------------|-----------------|
|                   |                  |              |                 |

Signatures:

\_\_\_\_\_

RRT Leader

\_\_\_\_\_

Ward Doctor / Nurse
